# Supplementary material for: Travelling through the Natural Hierarchies of Type I Collagen with X-rays: From Tendons of Cattle, Horses, Sheep and Pigs
Source: MDPI journal article supplement (doi:10.3390/ma16134753), 2023-06-30
Supplement: s1 [file s1]

## Supplementary Material

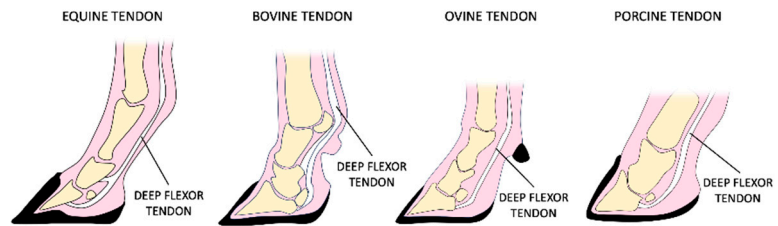

**Figure S1.** Schematic description of anatomic part of the extensor tendon explored here.

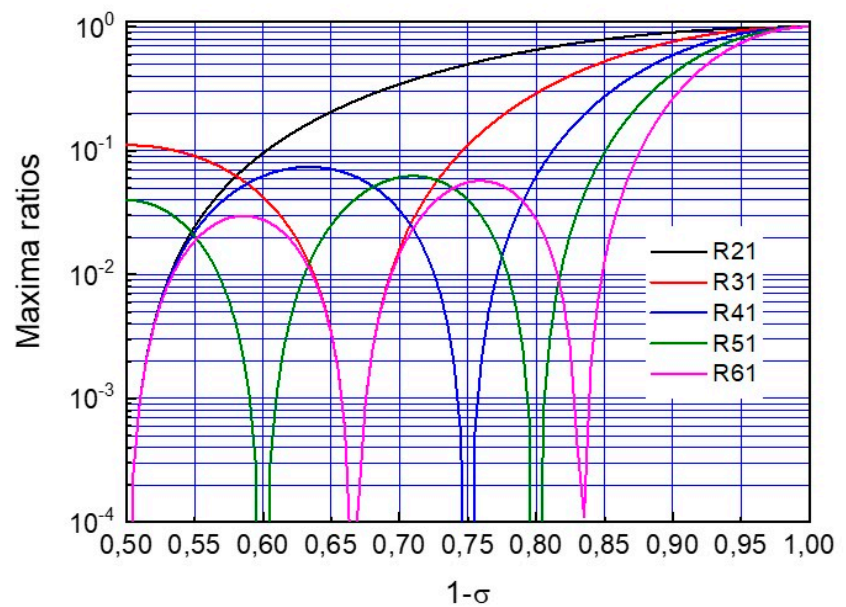

**Figure S2.** Systematic absences in the collagen diffraction pattern. In a kinematical approximation, for the electron density function described in [1], the  $n$ -th diffraction order is missing if  $n$  times sigma is exactly equal to an integer number.

[1] Giannini, C.; De Caro, L.; Terzi, A.; Fusaro, L.; Altamura, D.; Diaz, A.; Lassandro, R.; Boccafroschi, F.; Bunk, O. Decellularized Pericardium Tissues at Increasing Glucose, Galactose and Ribose Concentrations and at Different Time Points Studied Using Scanning X-ray Microscopy. *IUCrJ* 2021, 8, 621–632, doi:10.1107/S2052252521005054.
